# Supplementary material for: mRNA Cap Methyltransferase, RNMT-RAM, Promotes RNA Pol II-Dependent Transcription
Source: PubMed Central journal article supplement (PMC5946721; doi:10.1016/j.celrep.2018.04.004), 2018-05-02
Supplement: mmc1.pdf [file mmc1.pdf]

**Cell Reports, Volume 23**

**Supplemental Information**

**mRNA Cap Methyltransferase, RNMT-RAM,  
Promotes RNA Pol II-Dependent Transcription**

**Dhaval Varshney, Olivia Lombardi, Gabriele Schweikert, Sianadh Dunn, Olga Suska, and Victoria H. Cowling**

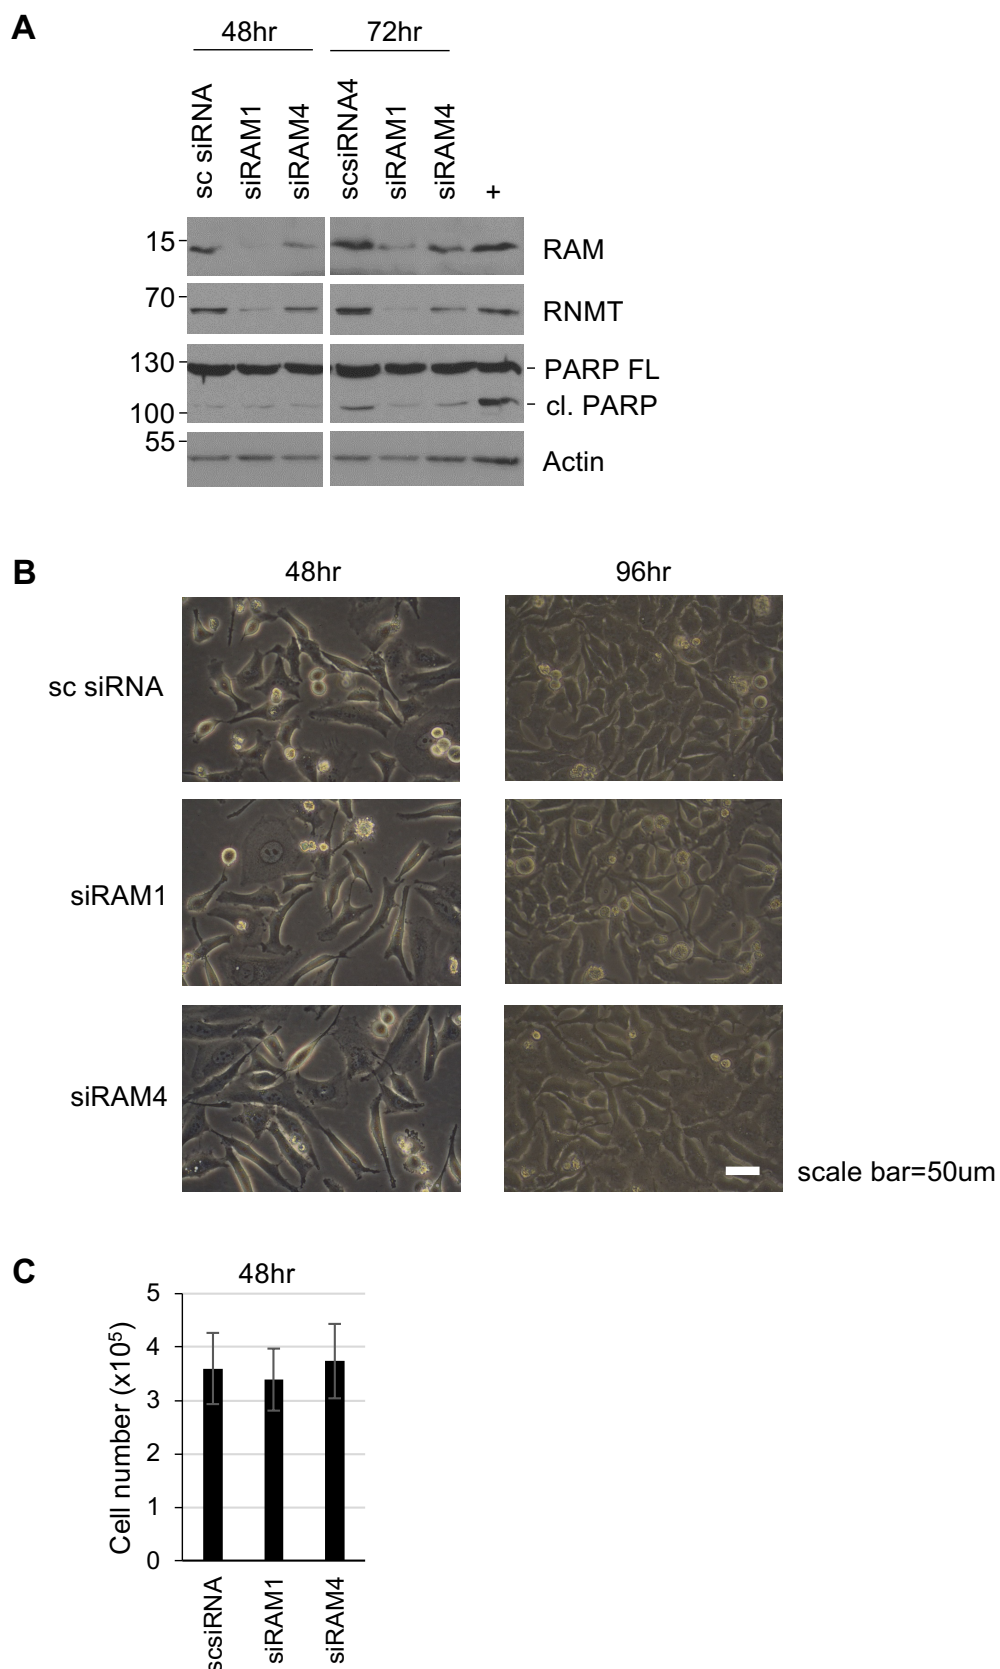

**Figure S1, related to Figure 1: Impact of RAM depletion on cell number and apoptosis**

HeLa cells were transfected with siRAM1, siRAM4 and sc siRNA (scrambled control). After time indicated, a) RAM expression and cleavage of PARP assessed by western blot. "+" indicates cells treated with 250um THZ-1 for 2 hours to induce apoptosis (representative of 2 independent experiments), b) phase-contrast images taken at 400X magnification (representative of 2 independent experiments), c) cells were counted (average and standard error presented for 3 independent experiments).

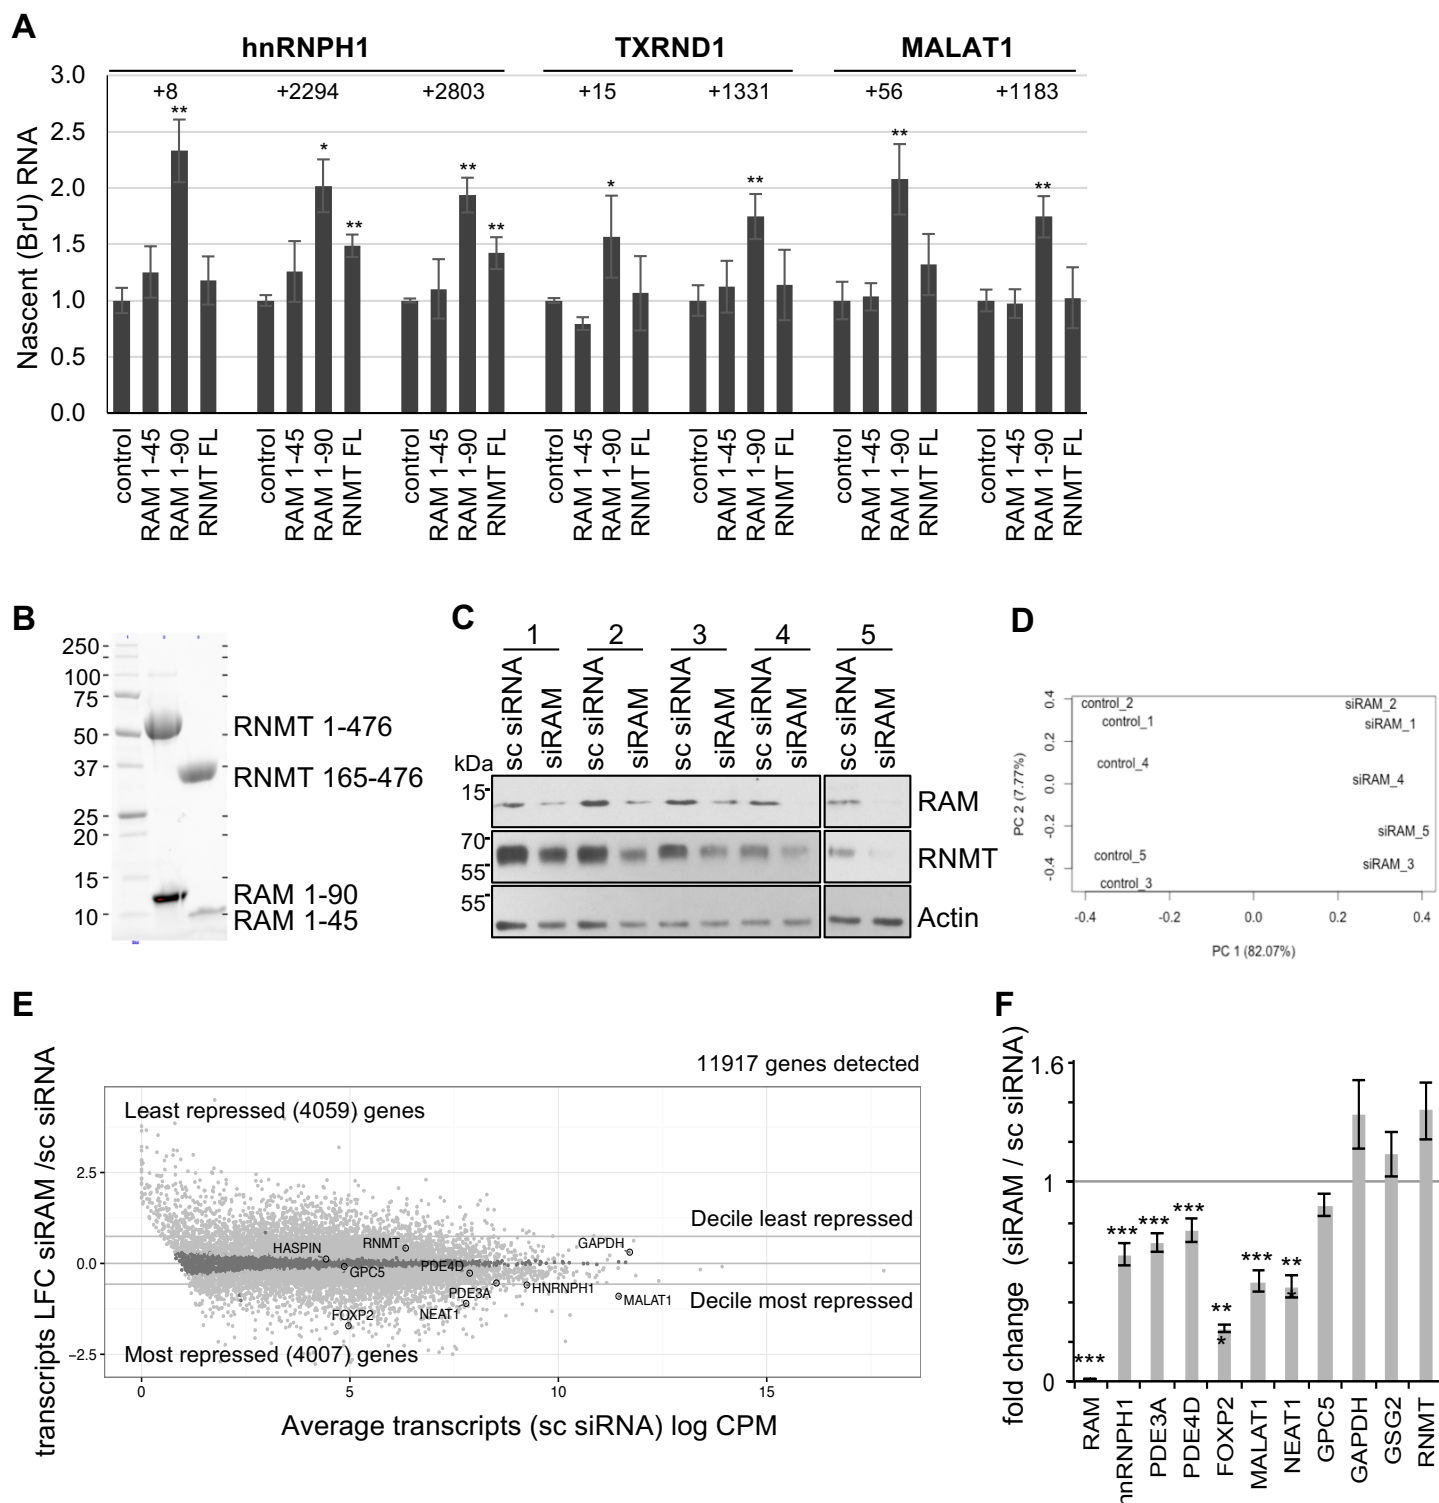

**Figure S2, related to Figure 1. Impact of RAM on transcription.**

a) HeLa nuclei were incubated with NTPs, BrUTP and recombinant RNMT, RAM 1-90 or RAM 1-45 for 20mins. Br-RNA purified and used as a substrate for PCR with primers indicated. Average and standard deviation presented.  $n=4$ . \*,  $P < 0.05$ ; \*\*,  $P < 0.01$ ; Students t-test. b) SDS-PAGE analysis of recombinant RNMT-RAM proteins used in this study. c) HeLa cells transfected with siRAM 1 or sc siRNA for 36 hours, in five independent biological replicates. Western blot analysis. d) Principal components analysis of RNA sequencing performed. e) RNA sequencing analysis. Scatter plot of differential transcript expression following RAM siRNA or sc siRNA transfection for 36hrs ( $n=5$ ). For each annotated gene locus,  $\log_2$  fold change (LFC siRAM/sc siRNA) expression plotted against expression in control cells ( $\log_2$  counts per million (logCPM) of uniquely aligned reads). Deciles most and least repressed indicated. Most repressed genes (○) and least repressed genes shaded lighter and annotated. f) HeLa cells transfected with siRAM1 or sc siRNA for 36hrs. RTPCR analysis of mRNA indicated following.  $n=3$  \*\*\*,  $P < 0.005$ ; Students t-test.

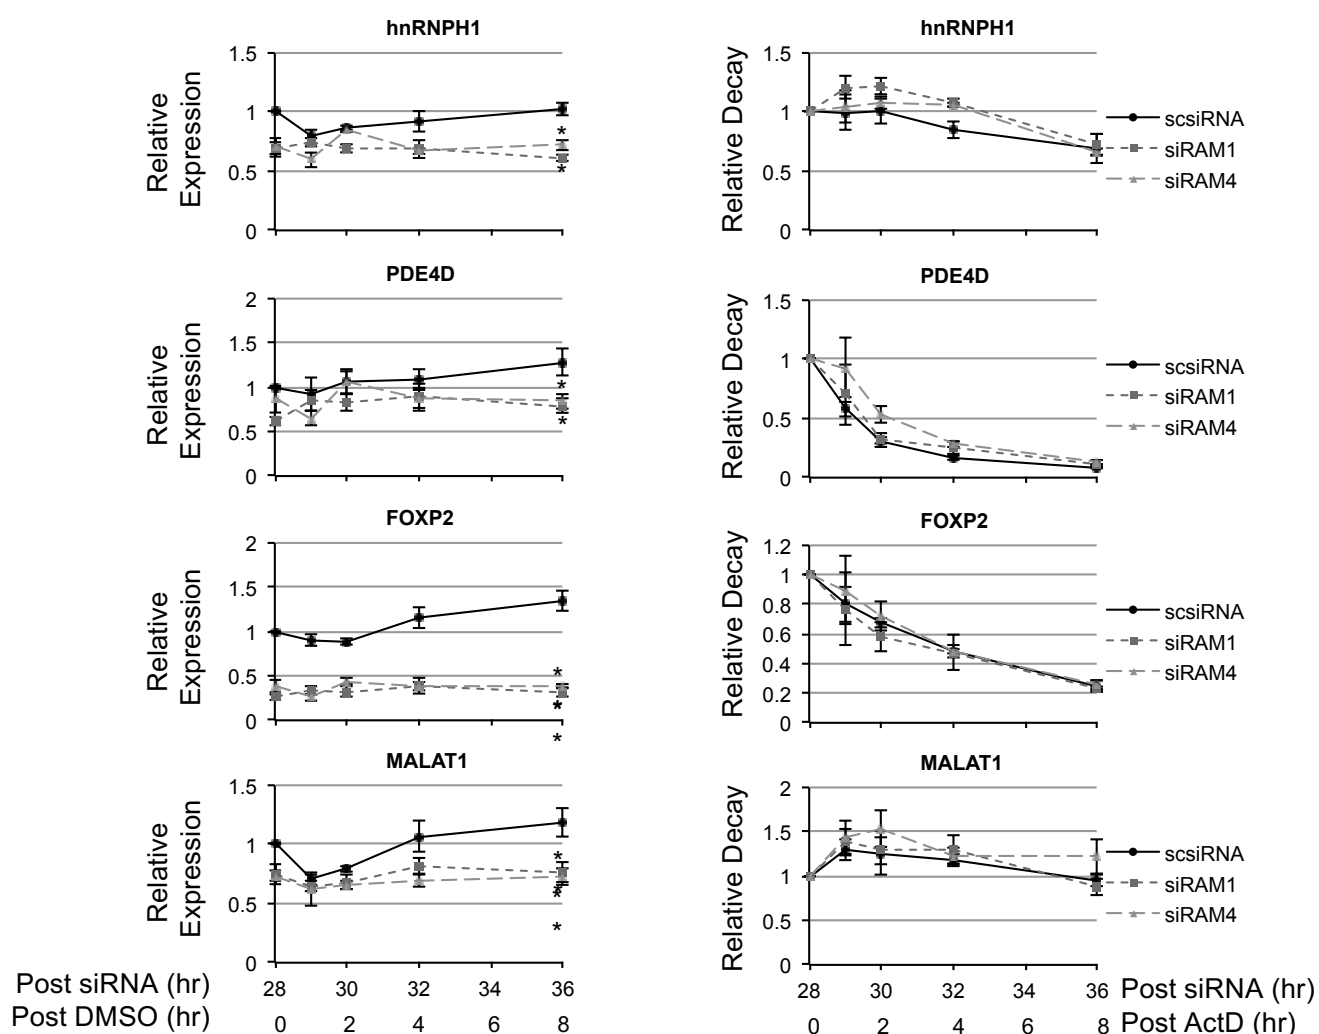

**Figure S3, related to Figure 1. Gene expression analysis following RAM siRNA transfection**

HeLa cells transfected with RAM siRNA or non-targeting control. 28 hours post-transfection  $3\mu\text{g}/\mu\text{l}$  Actinomycin D or DMSO control added for further 8 hours. Mature transcript level determined by RTPCR. DMSO control data (left panels) normalised to 0 hour scrambled control. Actinomycin D data normalised to 0 hour samples for each siRNA (right panels).



A

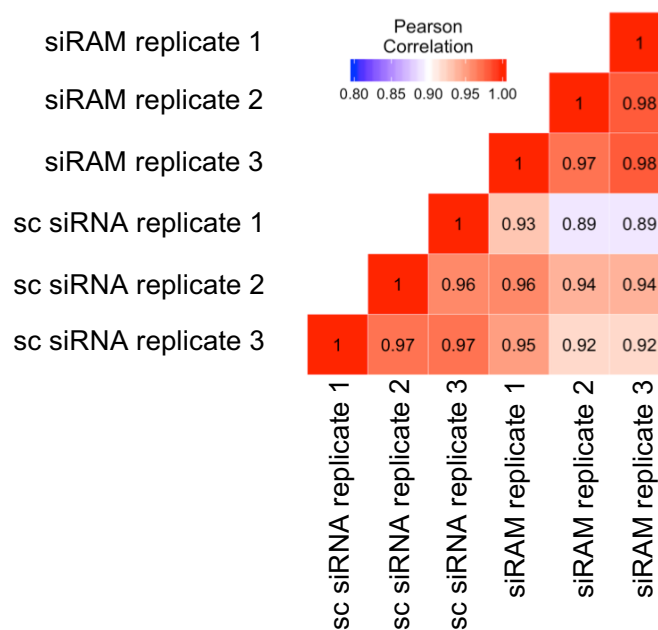

B

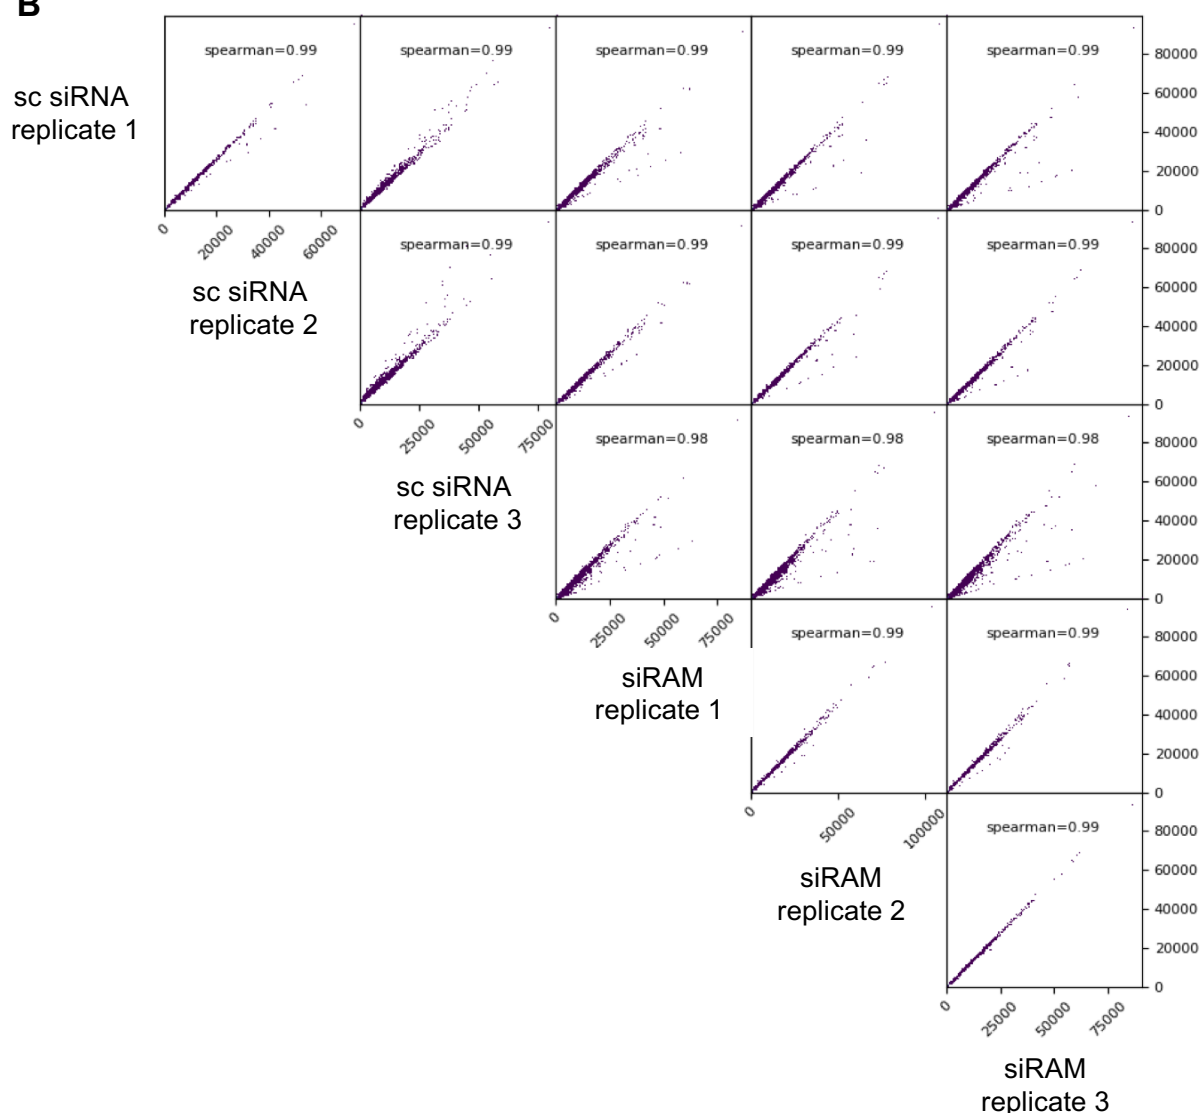

**Figure S4, related to Figure 2. Correlation of RNA Pol II ChIP-Seq replicates**

A) Heatmap for Pearson correlation of individual RNA pol II ChIP replicates from HeLa cells transfected with siRAM 1 or sc siRNA for 36 hours. Genome wide correlation for tag alignment to 10Kb bins. B) Scatterplots for RNA pol II ChIP replicates showing the total number of tags uniquely aligning to individual annotated loci. Calculated Spearman correlation values shown.

**Figure S5**

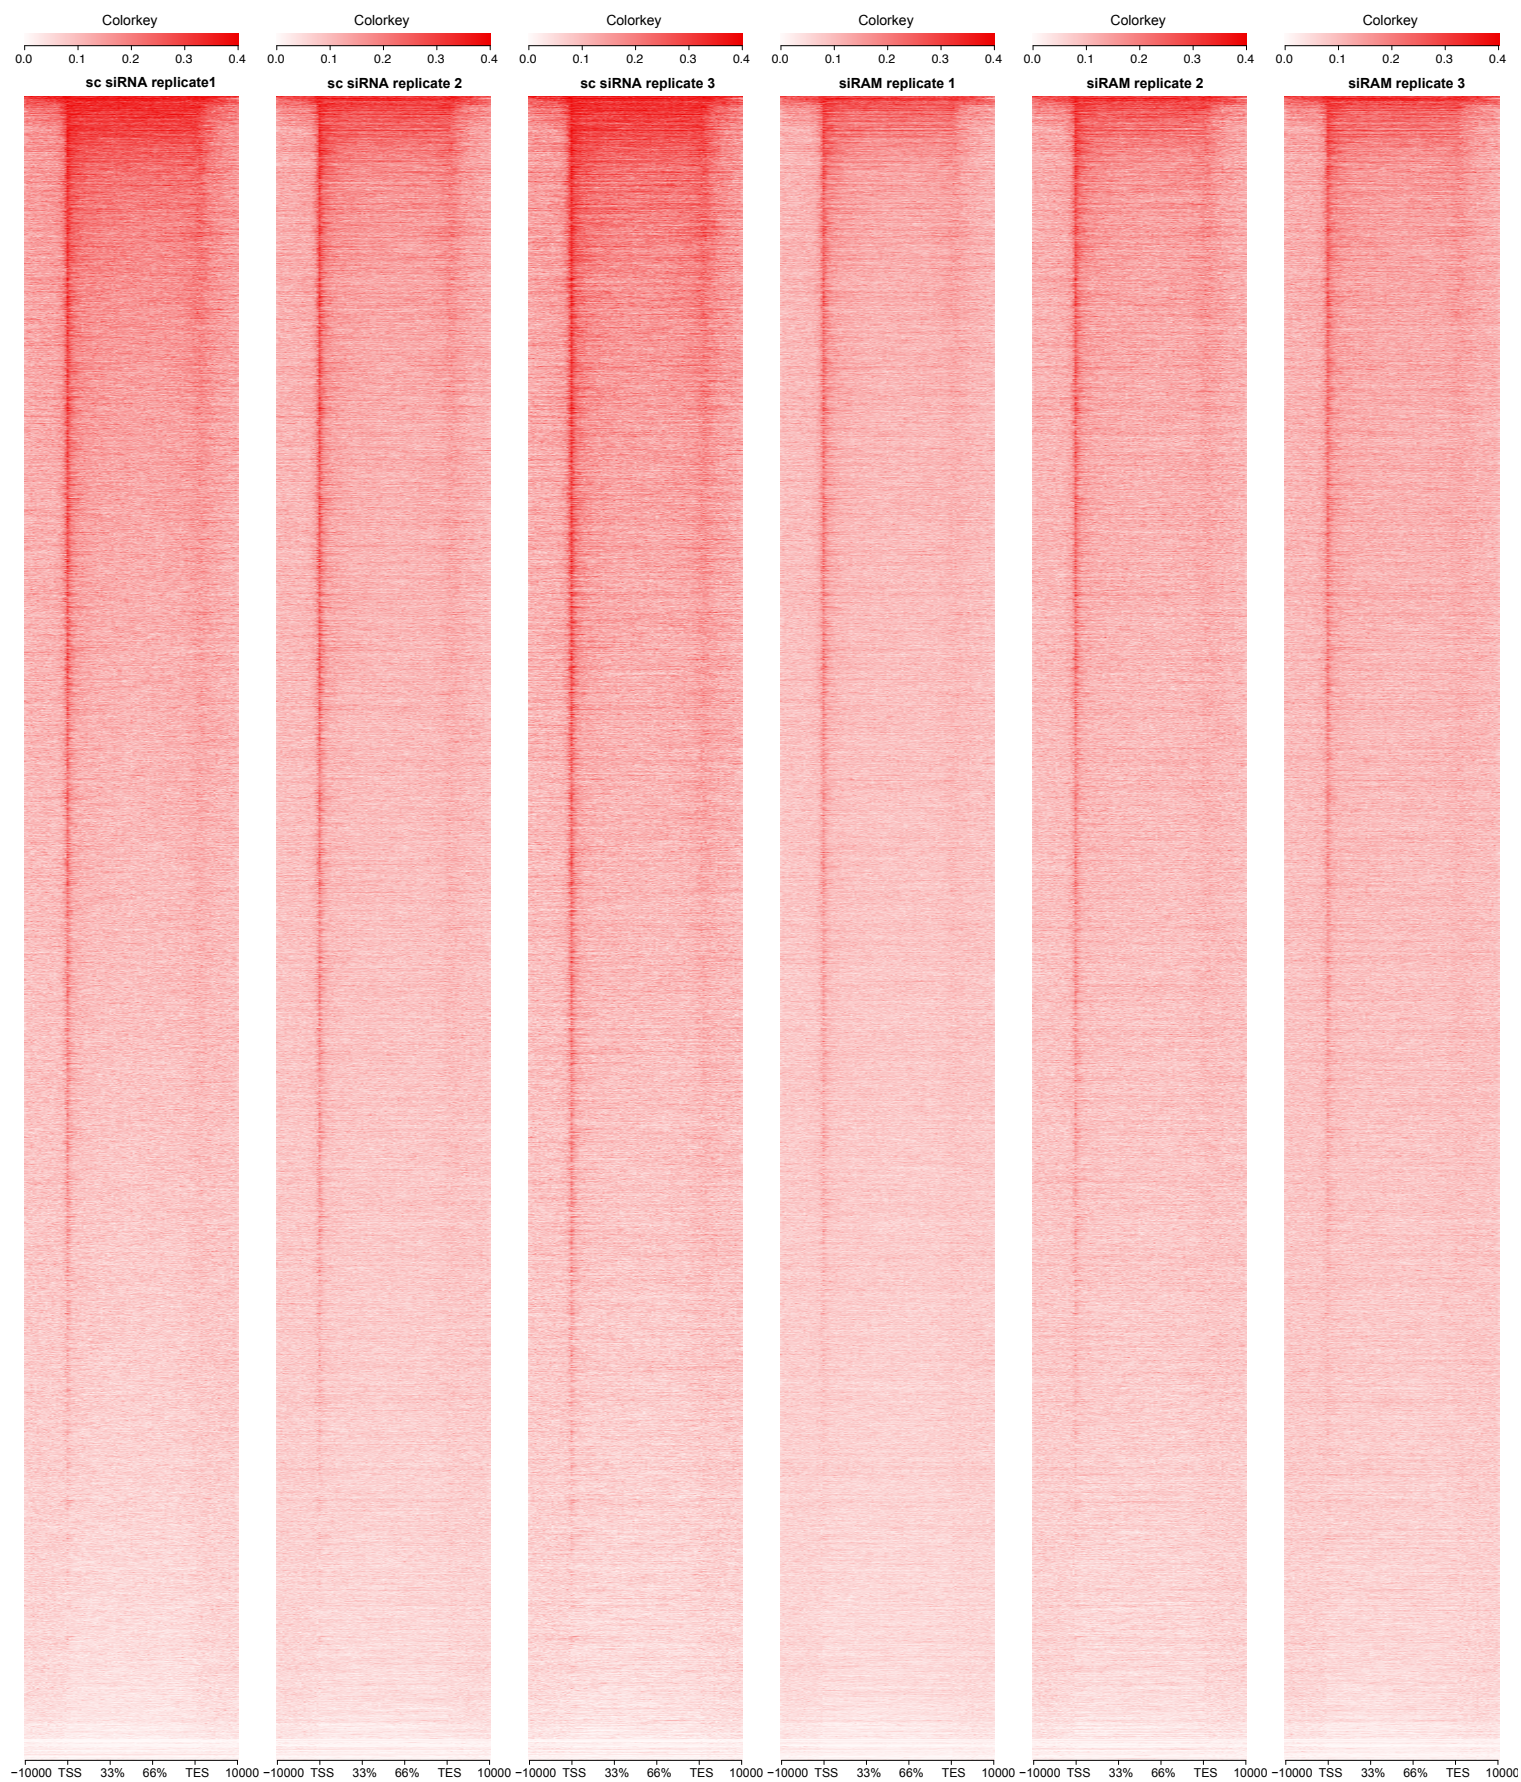

**Figure S5, related to Figure 2. Heatmaps for RNA pol II ChIP replicates over gene bodies**  
Gene body heatmaps for all annotated gene loci in human genome assembly hg38 produced using ngs.plot (Shen et al., 2014)

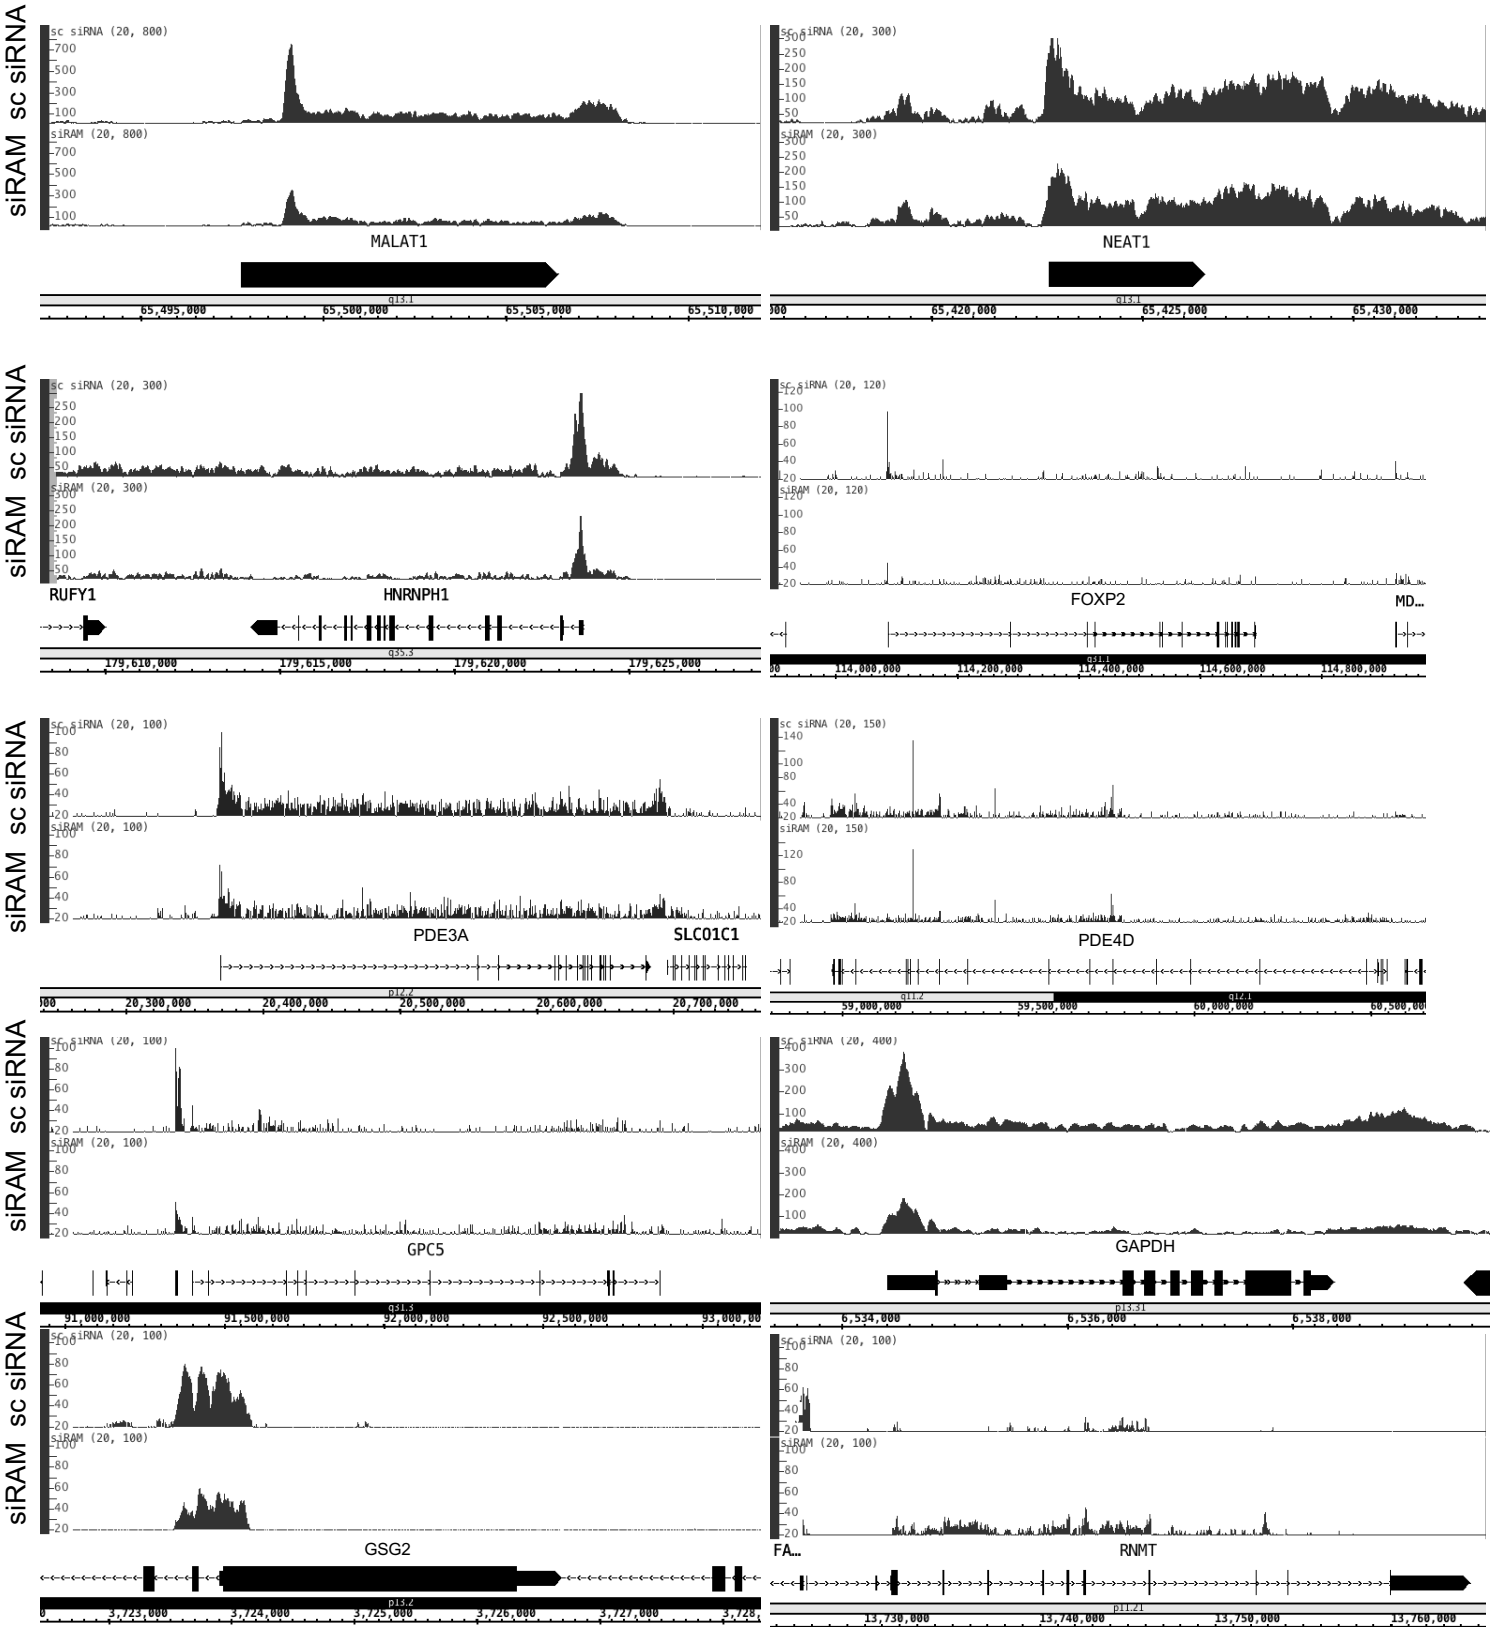

**Figure S6, related to Figure 2. RNA Pol II ChIP signal at individual gene loci**  
Snapshot of RNA pol II ChIP tag distribution over individual gene loci following *sc* siRNA or siRAM transfection. Profiles created using pooled data from three replicates. Minimum cutoff of 20 tags.

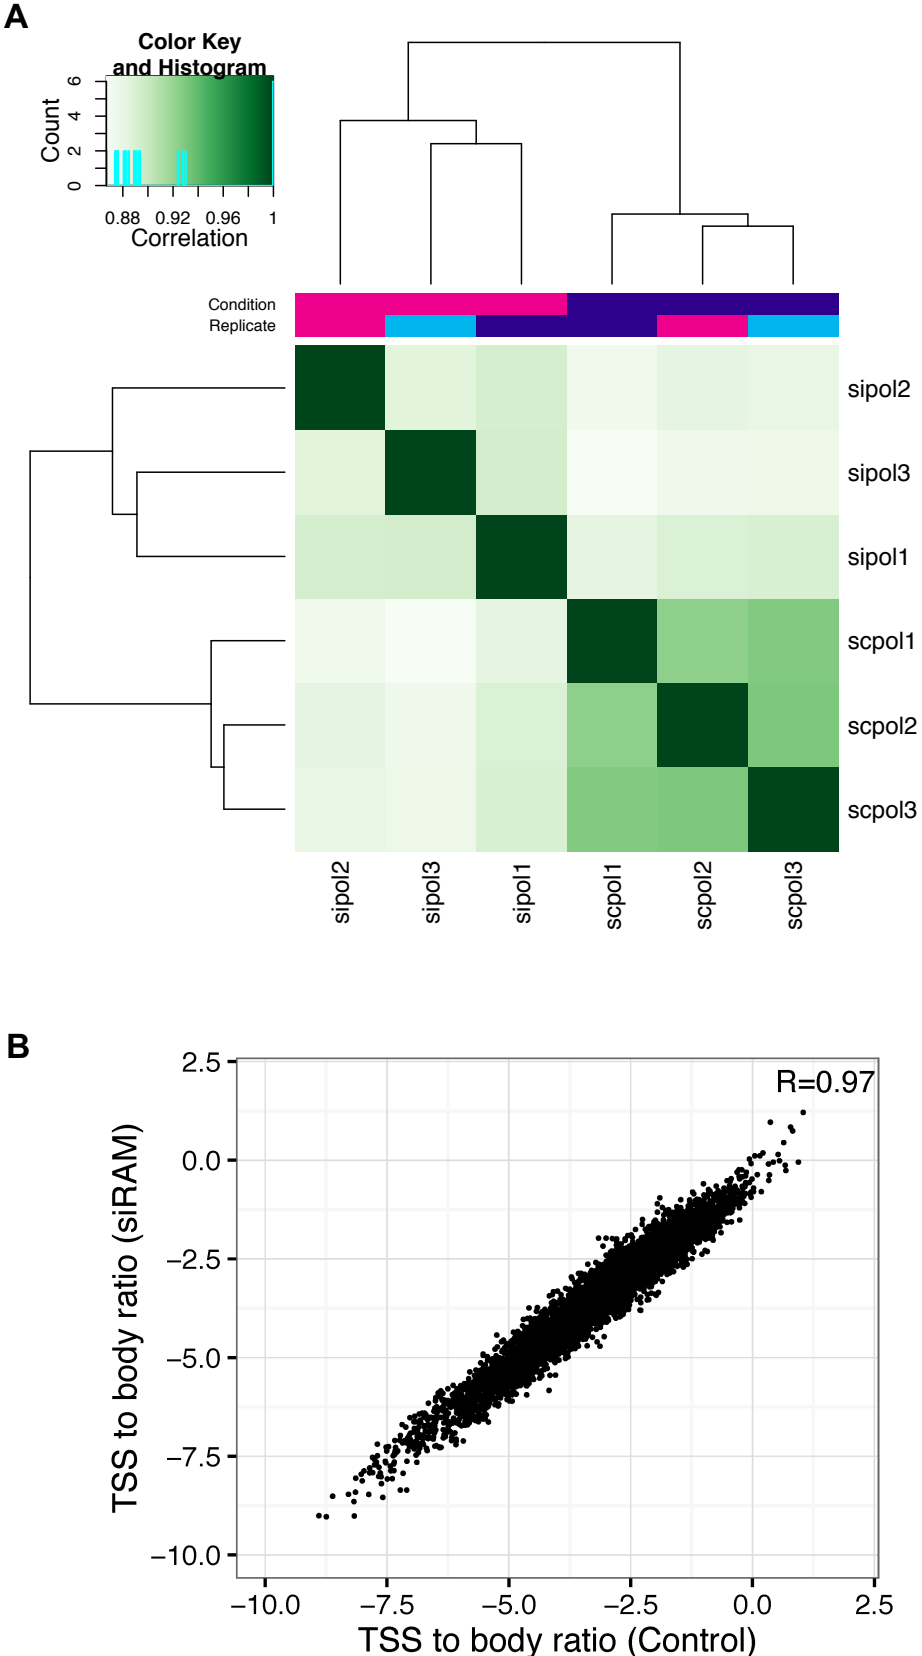

**Figure S7, related to Figure 2. RAM depletion results in RNA pol II depletion**

a) Correlation heatmap for peaks called from three independent biological replicates for RNA pol II occupancy in sc siRNA (sc) and siRAM (si) transfected cells. b) Correlation of Log<sub>2</sub> CPM TSS/gene body ratios of RNA pol II occupancy in sc siRNA (control) and siRAM transfected cells. R value represents Pearson's correlation.

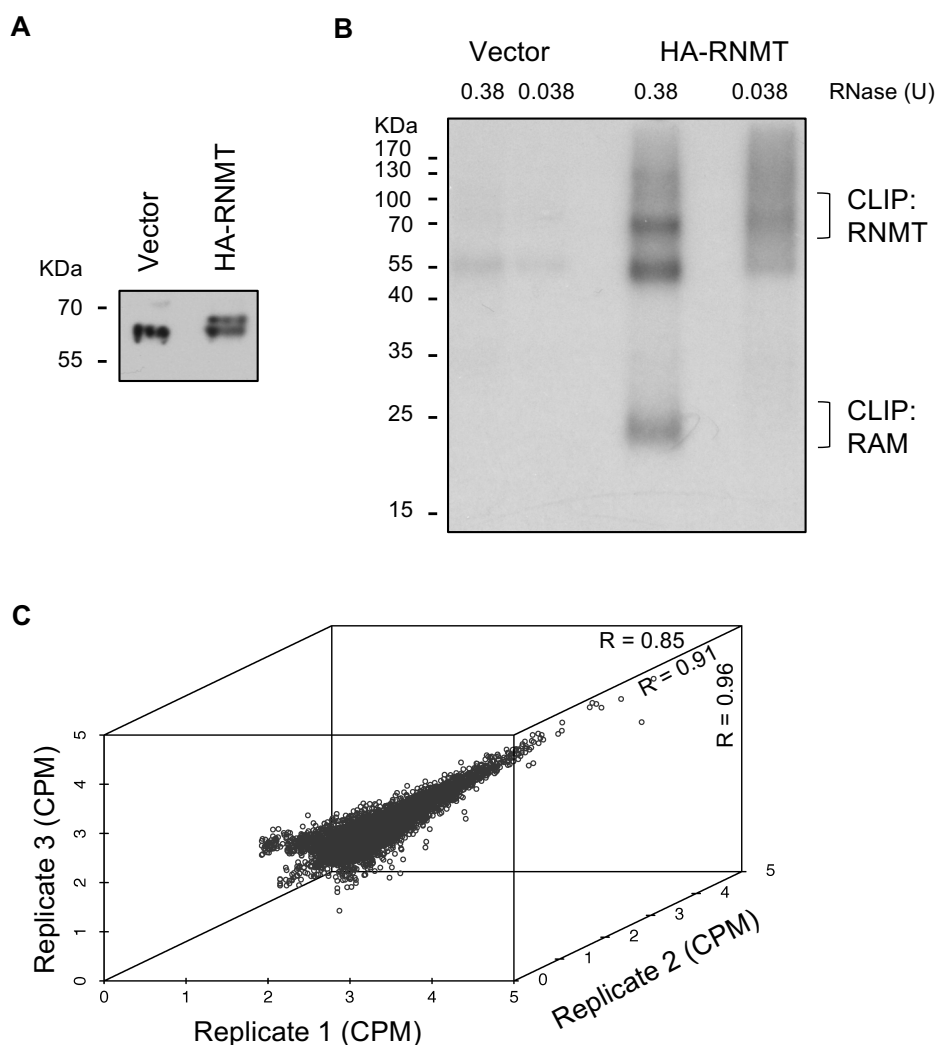

### Figure S8, related to Figure 3. HA-RNMT expression and RNMT-CLIP

a) Western blot analysis of RNMT expression in HA-RNMT-expressing and vector control HeLa cells. The lower band is endogenous RNMT, the upper band is HA-RNMT. b) CLIP assay performed on HeLa cells stably expressing HA-RNMT or vector control. Immunoprecipitation performed with anti-HA antibody after RNase treatment. Reduced RNase concentration resulted in smearing of the  $^{32}\text{P}$ -RNMT band and reduced intensity of the  $^{32}\text{P}$ -RAM band. RAM is likely to be tethered to RNMT via RNA, migrating in a large RNMT-RAM-RNA complex. RNA from smear between 70 and 100 kDa was isolated for sequencing. c) Following RNA sequencing analysis, scatter plot of total counts per million (CPM) uniquely aligned reads per annotated gene locus, for three HA-RNMT CLIP replicates. Correlation scores on xy, yz and xz planes.

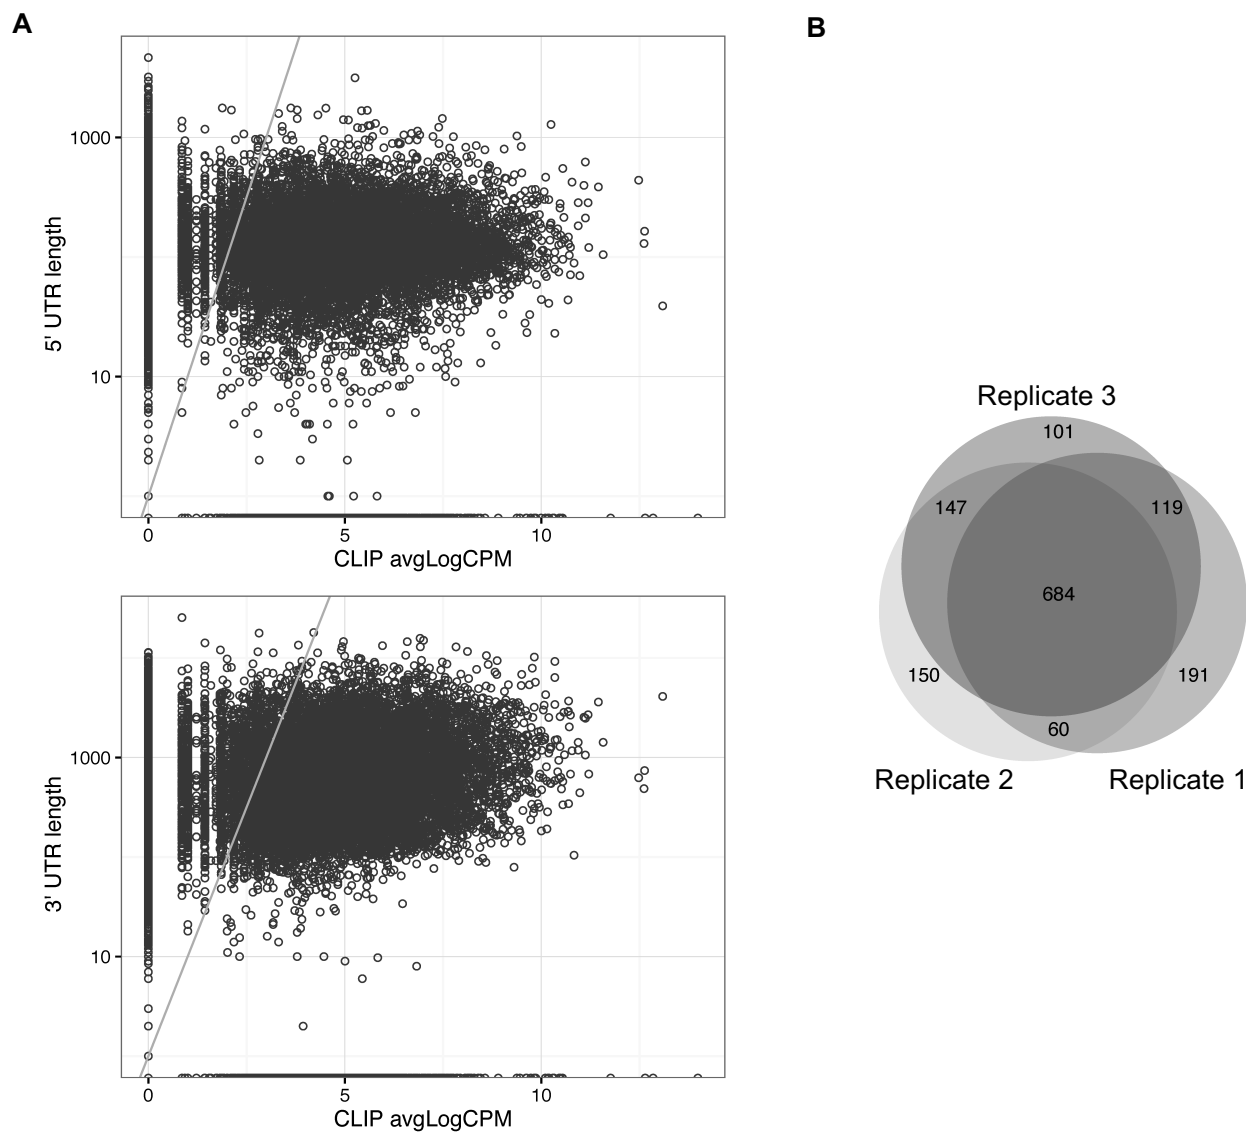

**Figure S9, related to Figure 6. Correlation of RNMT CLIP signal and UTR length**

a) Average  $\text{Log}_2$  CPM from RNMT CLIP signal from three independent biological replicates plotted against the maximal annotated UTR length for each gene model. b) Venn diagram of top quartiles for three RNMT CLIP replicates. Intersection of annotated gene loci with maximum number of uniquely aligned reads denoted “RNMT-enriched targets”.

**Table S1, related to Figures 1 and 5. Oligo sequences used for RT-qPCR analysis and CLIP library preparation**

| Target                | Primer | Sequence                                            |
|-----------------------|--------|-----------------------------------------------------|
| Actin                 | F      | CCCAGAGCAAGAGAGG                                    |
| Actin                 | R      | GTCCAGACGCAGGATG                                    |
| FOXP2                 | F      | CACTTCCTGTCCAATCGCTG                                |
| FOXP2 mature          | R      | TTGGAGGAGGTAGTCGAGGA                                |
| FOXP2 nascent         | R      | GCCACCATGTAAACAATCACG                               |
| GAPDH                 | F      | GGAGTCAACGGATTTGG                                   |
| GAPDH                 | R      | GTAGTTGAGGTCAATGAAGGG                               |
| GPC5                  | F      | GGAGAGATATCAGATTGCGGC                               |
| GPC5                  | R      | ACATAACACGGCCAGTCCTT                                |
| Haspin                | F      | GTCCGACGATCCTGACGAT                                 |
| Haspin                | R      | TTTGGGGTACGGTCAGG                                   |
| hnRNPH1               | F      | GGTGTGAAGCATACTGGTCC                                |
| hnRNPH1 mature        | R      | GTCCACCGGCAATGTTATCC                                |
| hnRNPH1 nascent       | R      | GCTAGCCAAAACACTACTGCT                               |
| MALAT1                | F      | GACGGAGGTTGAGATGAAGC                                |
| MALAT1                | R      | ATTCGGGGCTCTGTAGTCCT                                |
| NEAT1                 | F      | TTGTTCCAGAGCCCATGAA                                 |
| NEAT1                 | R      | TGAAAACCTTTACCCAGGA                                 |
| PDE3A                 | F      | CAGCAGCAAGTCCCATCG                                  |
| PDE3A mature          | R      | CTGTGATCCTCTTGGCCCTC                                |
| PDE3A nascent         | R      | CTTCCCTTTAGTTCCAGCG                                 |
| PDE4D                 | F      | CATGTGCAACCAACCATCCA                                |
| PDE4D mature          | R      | TAGGGTCTCTAGCTGGTCCA                                |
| PDE4D nascent         | R      | TGACTCTTGGCAGAAATGGT                                |
| RAM                   | F      | CCTCAAACCTTTGGGATT                                  |
| RAM                   | R      | TTCCTGATACTCCTTGTC                                  |
| RNMT                  | F      | GTA CTGATATTGCCGATGT                                |
| RNMT                  | R      | ATTC ACTATCACGACGATT                                |
| CLIP - RT Primer      |        | CNNNNGATCGTCGGACTGTAGA ACTCTG<br>AACGGATCCCTTGGCACC |
| Cut Oligo             |        | CCAAGGGATCCGTT CAGAGTTCTAAAA                        |
| HNRNPH1 NRO 8-77      | F      | ACCTTATTTAGGTTGCGCAG                                |
| HNRNPH1 NRO 8-77      | R      | ACCTAGACACGCGACTTCTG                                |
| HNRNPH1 NRO 2294-2363 | F      | AACGGTTGTTTTCTTTCCAGACT                             |
| HNRNPH1 NRO 2294-2363 | R      | TCTGGTGTAGATGAAACGAATACCT                           |
| HNRNPH1 NRO 2803-2873 | F      | G TTCAGTTCTTCTCAGGTATGTAGT                          |
| HNRNPH1 NRO 2803-2873 | R      | CCTTGCCATAAGCTAGCCAAA                               |
| MALAT1 56-126         | F      | TTTTAGCAACGCAGAAGCCC                                |
| MALAT1 56-126         | R      | GAGGCGTCAGAGGGGAC                                   |
| MALAT1 1183-1253      | F      | ACTACTTTTTGCCTCCCTCAC                               |
| MALAT1 1183-1253      | R      | ACGGAGAACA ACTCGCATCA                               |
| TXNRD1 15-85          | F      | CTTGTGCGACATGGGCTG                                  |
| TXNRD1 15-85          | R      | TTTCGTCTGCAGCTCCGTT                                 |
| TXNRD1 1331-1401      | F      | CAAGGTCAGGCAAGGTCCA                                 |



|                  |   |                         |
|------------------|---|-------------------------|
| TXNRD1 1331-1401 | R | CCTGCTCAAACCTCCTTCATTGT |
| HNRNPH1+1        | F | GTGGGCTGGCTCTTGAAATT    |
| HNRNPH1+1        | R | GGCTAAGACGAAATGGCCAG    |
| HNRNPH1+500      | F | CTCTCAGTTCTGGTCCTCCC    |
| HNRNPH1+500      | R | GTGCCCAACATCATCGTCTC    |
| HNRNPH1+1000     | F | GCAGGTTTGGCAGACTTTGT    |
| HNRNPH1+1000     | R | AGCTTGGGTGACAGAGACTC    |
| FOXP2+1          | F | CTTTGTCACCCCTCACGTTG    |
| FOXP2+1          | R | GTGATTGTTTTGGCGTCCGT    |
| FOXP2+500        | F | AGAGAGGGGTGGGATTTTACG   |
| FOXP2+500        | R | GCTTTTCCCTCGCAAACAGA    |
| FOXP2+1000       | F | AGAACCTGGGATCCTATTGGG   |
| FOXP2+1000       | R | CCCTCATAGCTTGTTTCATGCA  |
| PDE3A+1          | F | TGAGCGTGCTAGCCTTTAAC    |
| PDE3A+1          | R | GCCCACAATCCACTGAAAGT    |
| PDE3A+500        | F | TTCTGGATGGGCTTGTACCT    |
| PDE3A+500        | R | CGCTAGTCAAGGCGATCAT     |
| PDE3A+1000       | F | GAGGGAACAGGTAAGCACTG    |
| PDE3A+1000       | R | CTTCCCTTTAGTTCCAGCG     |
| GAPDH+1          | F | TACTAGCGGTTTTACGGGC     |
| GAPDH+1          | R | GCTGCGGGCTCAATTTATAG    |
| GAPDH+500        | F | GAACCGCGTCTACGAGC       |
| GAPDH+500        | R | CTGACCTTGAGCTCTCCTTG    |
| GAPDH+1000       | F | GATTTCTCCTCCGGGTGATG    |
| GAPDH+1000       | R | CCAACCTACCCATGACTCAGC   |
